# Supplementary material for: 5-Fluorouracil “Chemowraps” in the Treatment of Multiple Actinic Keratoses: A Norwich Experience
Source: PubMed Central journal article supplement — Dermatol Ther (Heidelb). 2015 Aug 25;5(3):201–5. doi: 10.1007/s13555-015-0082-5 (PMC4580657; doi:10.1007/s13555-015-0082-5), 2015-08-25
Supplement: 13555_2015_82_MOESM1_ESM.pdf [file 13555_2015_82_MOESM1_ESM.pdf]

## *Why carry out this study?*

- Large areas of sun-damaged skin such as that found on upper and lower limbs with field cancerization are difficult to treat with currently available therapies.
- We undertook a pilot study here in Norwich to test out a technique with topical 5-fluorouracil under occlusion (chemowraps).

## *What was learned from this study?*

- We found that patients tolerated the treatment regimen well, and there was substantial clinical improvement in their skin when treatment was complete.
- Systemic and local toxicity side-effects were low and patient satisfaction high.
- There is a need to conduct a larger-scale, double-blinded, placebo-controlled randomized clinical trial to establish whether this technique is a viable option for dermatologists.

This summary slide represents the opinions of the authors. No funding or sponsorship was received for this study or publication of this article. For a full list of acknowledgments and conflicts of interest for all authors of this article, please see the full text online. Copyright © The Author(s) 2015. Creative Commons Attribution Noncommercial License (CC BY-NC).
